# Supplementary material
Source: HighWire-hosted journal article supplement (https://gut.bmj.com/content/66/10/1802)
Supplement: inline-supplementary-material-3 [file inline-supplementary-material-3.pdf]

| Patient | Gender | Age upon diagnosis | Stage | KRAS Mutation | Tumor localisation         | Synchronous metastasis site | Radiotherapy before surgery | Chemotherapy before surgery                   |
|---------|--------|--------------------|-------|---------------|----------------------------|-----------------------------|-----------------------------|-----------------------------------------------|
| CPP17   | F      | 78                 | II    | Non tested    | Right colon                | N/A                         | No                          | No                                            |
| CPP18   | H      | 66                 | IV    | no            | Left colon                 | Liver                       | No                          | Folfox 4                                      |
| CPP19   | H      | 65                 | IV    | KRAS          | Right colon                | Liver                       | No                          | Bevacizumab + Folfiri                         |
| CPP20   | F      | 42                 | III   | KRAS          | Left colon                 | N/A                         | No                          | No                                            |
| CPP21   | H      | 68                 | IV    | KRAS          | Sigmoid colon              | Liver                       | No                          | Bevacizumab + Folfiri                         |
| CPP22   | F      | 69                 | IV    | no            | Sigmoid colon              | lung and other              | Yes                         | Yes (NR)                                      |
| CPP23   | F      | 63                 | I     | Non tested    | rectum                     | N/A                         | Yes                         | Capecitabine                                  |
| CPP24   | H      | 68                 |       | KRAS          | rectum                     | Lung                        |                             | Bevacizumab<br>Cetuximab + Folfiri            |
| CPP25   | H      | 77                 | II    | no            | rectum                     | N/A                         | Yes                         | Capecitabine                                  |
| CPP26   | H      | 76                 | IV    | Non tested    | Sigmoid colon              | Liver                       | No                          | Folfox 4                                      |
| CPP27   | H      | 33                 | III   | no            | Right colon                | N/A                         | No                          | No                                            |
| CPP28   | F      | 55                 | IV    | no            | rectum                     | Liver                       | No                          | Folfirinox                                    |
| CPP29   | F      | 48                 | IV    | no            | Sigmoid colon              | Liver                       | No                          | Cetuximab + Folfiri                           |
| CPP30   | H      | 69                 | IV    | no            | Sigmoid colon              | Liver                       |                             | Bevacizumab +<br>Folfox4 + Folfiri +<br>Xelox |
| CPP31   | F      | 63                 | II ?  | KRAS          | rectum                     | N/A                         | Yes                         | Capecitabine +<br>Folfirinox                  |
| CPP32   | H      | 65                 | III   |               | Right colon                | N/A                         | No                          | No                                            |
| CPP33   | H      | 62                 | IV    | no            | Sigmoid colon              | Liver                       | No                          | Folfox 4                                      |
| CPP34   | H      | 65                 | II    | KRAS          | Left colon                 | N/A                         | No                          | No                                            |
| CPP35   | H      | 81                 | II    | Non tested    | colon transverse           | N/A                         | No                          | No                                            |
| CPP36   | H      | 81                 | IV    | KRAS          | Sigmoid colon              | Liver                       | No                          | Bevacizumab +<br>Folfiri                      |
| CPP37   | F      | 60                 | IV    | no            | rectum                     | N/A                         | Yes                         | Capecitabine +<br>Folfox 4 + Xelox            |
| CPP38   | F      | 68                 | II    | Non tested    | left colon and<br>sigmoide | N/A                         | No                          | No                                            |
| CPP39   | H      | 83                 | III   | Non tested    | Right colon                | N/A                         | No                          | No                                            |
| CPP40   | F      | 75                 | IV    | Non tested    | Right colon                | N/A                         | No                          | Bevacizumab +<br>Folfox 4 + Tomox             |
| CPP401  | F      | 70                 | III   | no            | Right colon                | N/A                         | No                          | No                                            |
| CPP42   | H      | 63                 | IV    | KRAS          | Right colon                | Brain                       | Yes                         | Bevacizumab +<br>Folfox 4                     |
| CPP43   | H      | 90                 | II    | Non tested    | Left colon                 | N/A                         | No                          | No                                            |
| CPP44   | F      | 66                 | IV    | KRAS          | Right colon                | Liver                       | No                          | No                                            |

|              |   |    |     |            |                      |       |    |    |
|--------------|---|----|-----|------------|----------------------|-------|----|----|
| <b>CPP45</b> | H | 80 | IV  | KRAS       | Left colon           | Liver | No | No |
| <b>CPP46</b> | H | 77 | II  | Non tested | rectum               | N/A   | No | No |
| <b>CPP47</b> | F | 88 | II  | Non tested | Right and left colon | N/A   | No | No |
| <b>CPP48</b> | H | 77 | II  | Non tested | Right colon          | N/A   | No | No |
| <b>CPP49</b> | H | 95 | IV  | Non tested | Right colon          | Liver | No | No |
| <b>CPP50</b> | F | 81 | III | Non tested | Right colon          | N/A   | No | No |
| <b>CPP51</b> | H | 83 | II  | no         | Left colon           | N/A   | No | No |
